# Supplementary material
Source: Springer Nature journal article supplement (https://www.springermedizin.de/resource/supplementary/12936_2008_698_MOESM7_ESM.pdf/9548026)

Relative Intensities for 16 Strains in 24 Assays

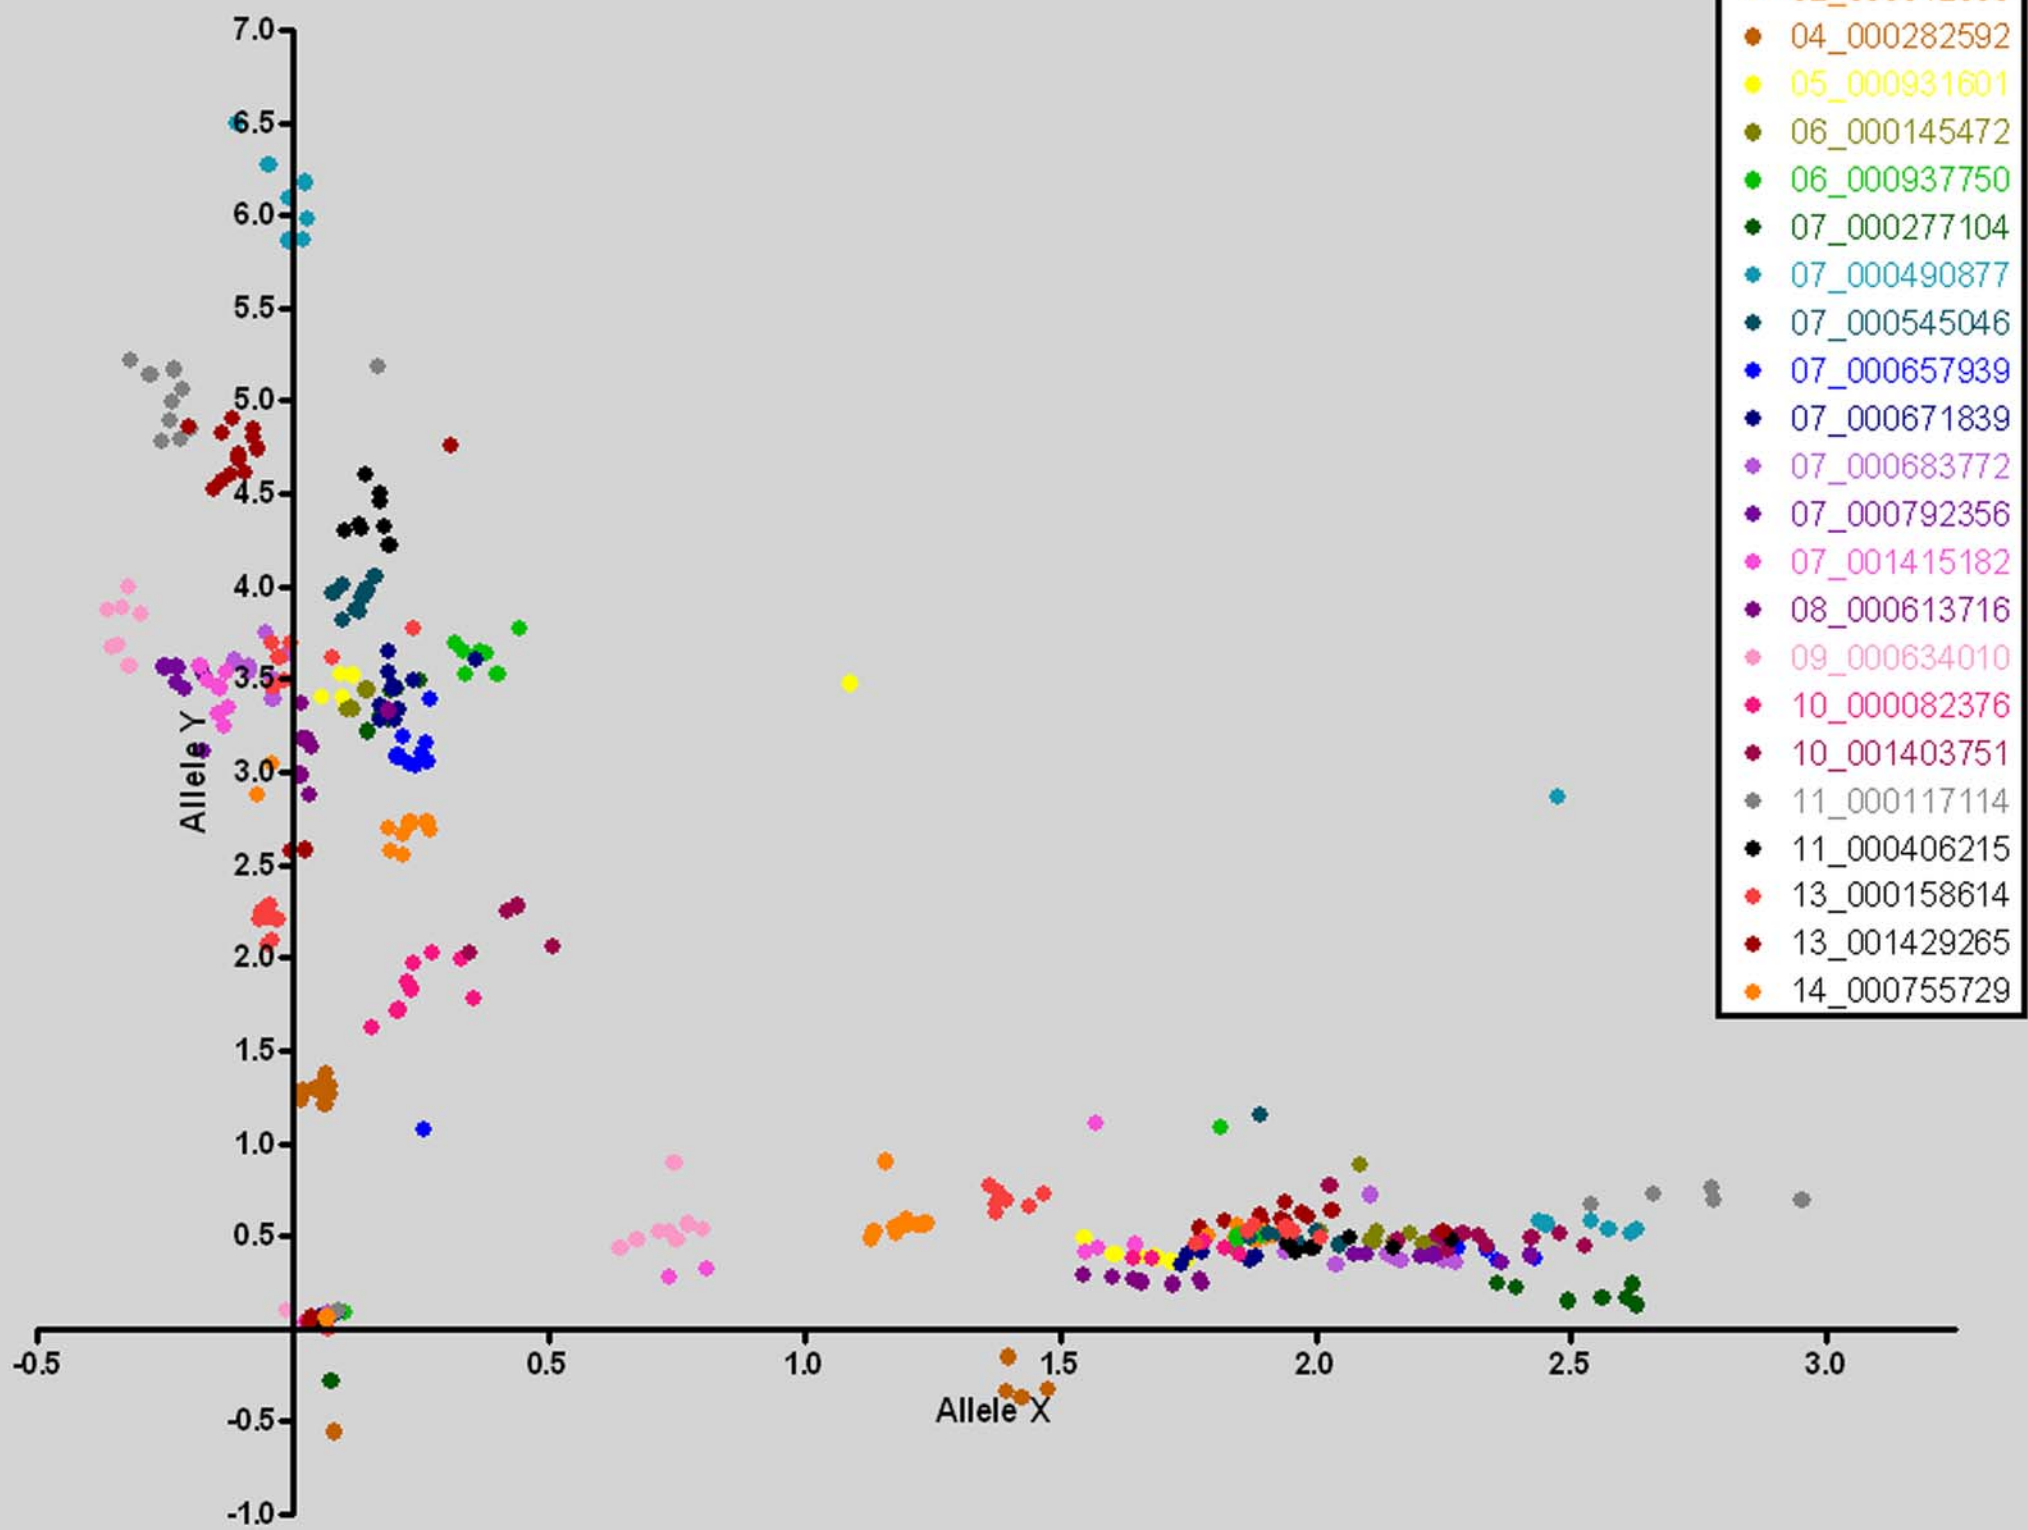

Supplement: MOESM7 [file 9548026]
